# Supplementary material for: Diverse Genetic Background of Multidrug-Resistant Pseudomonas aeruginosa from Mainland China, and Emergence of an Extensively Drug-Resistant ST292 Clone in Kunming
Source: PubMed Central journal article supplement (PMC4873832; doi:10.1038/srep26522), 2016-05-20
Supplement: srep26522-s1.pdf [file srep26522-s1.pdf]

**Diverse Genetic Background of Multidrug-Resistant *Pseudomonas aeruginosa* from Mainland China, and Emergence of an Extensively Drug-Resistant ST292 Clone in Kunming**

Xin Fan<sup>1,2</sup>, Yue Wu<sup>1,2</sup>, Meng Xiao<sup>1</sup>, Zhi-Peng Xu<sup>1</sup>, Timothy Kudinha<sup>3,4</sup>, Alda Bazaj<sup>1</sup>, Fanrong Kong<sup>4</sup>, and Ying-Chun Xu<sup>1,\*</sup>

<sup>1</sup>Department of Clinical Laboratory, Peking Union Medical College Hospital, Chinese Academy of Medical Sciences, Beijing, China;

<sup>2</sup>Graduate School, Peking Union Medical College, Chinese Academy of Medical Sciences, Beijing, China;

<sup>3</sup>Charles Sturt University, Leeds Parade, Orange, New South Wales, Australia;

<sup>4</sup>Centre for Infectious Diseases and Microbiology Laboratory Services, ICPMR – Pathology West, University of Sydney, Westmead Hospital, Darcy Road, Westmead, New South Wales, NSW 2145, Australia

**Supplementary Table S1. New sequence types (STs) and allelic profiles found in this study.**

| <b>Isolate ID no.</b> | <b>ST</b> | <b><i>acsA</i></b> | <b><i>aroE</i></b> | <b><i>guaA</i></b> | <b><i>mutL</i></b> | <b><i>nuoD</i></b> | <b><i>ppsA</i></b> | <b><i>trpE</i></b> | <b>Gender<sup>a</sup></b> | <b>Age</b> | <b>Collection<br/>year</b> | <b>Collection<br/>month</b> | <b>Comments</b> |
|-----------------------|-----------|--------------------|--------------------|--------------------|--------------------|--------------------|--------------------|--------------------|---------------------------|------------|----------------------------|-----------------------------|-----------------|
| GPMDP018              | 1950      | 40                 | 22                 | 11                 | 14                 | 4                  | 4                  | 7                  | M                         | 65         | 2012                       | April                       |                 |
| HBMDP006              | 1956      | 1                  | 4                  | 1                  | 11                 | 4                  | 10                 | 10                 | F                         | 63         | 2011                       | November                    |                 |
| HBMDP020              | 1960      | 16                 | 5                  | 77                 | 3                  | 1                  | 4                  | 7                  | M                         | 88         | 2012                       | April                       |                 |
| HNMDP002              | 1963      | 18                 | 5                  | 5                  | 3                  | 1                  | 17                 | 13                 | F                         | 71         | 2011                       | July                        |                 |
| HNMDP015              | 1964      | 16                 | 66                 | 11                 | 3                  | 4                  | 29                 | 7                  | M                         | 40         | 2011                       | October                     |                 |
| HZMDP011              | 1965      | 158                | 4                  | 1                  | 10                 | 3                  | 6                  | 3                  | M                         | 77         | 2011                       | September                   |                 |
| SCMDP001              | 1966      | 6                  | 5                  | 11                 | 3                  | 4                  | 3                  | 141                | M                         | 87         | 2011                       | August                      |                 |
| SCMDP004              | 1967      | 39                 | 166                | 41                 | 5                  | 4                  | 6                  | 7                  | M                         | 61         | 2011                       | September                   | IMP-9-producer  |
| SDMDP037              | 1968      | 17                 | 166                | 6                  | 157                | 4                  | 4                  | 13                 | M                         | 74         | 2012                       | June                        |                 |
| SJMDP015              | 1969      | 111                | 30                 | 31                 | 141                | 30                 | 24                 | 55                 | M                         | 57         | 2012                       | March                       |                 |
| SZMDP006              | 1970      | 11                 | 10                 | 36                 | 3                  | 4                  | 38                 | 3                  | M                         | 90         | 2011                       | November                    |                 |
| TJMDP022              | 1971      | 32                 | 190                | 3                  | 62                 | 8                  | 7                  | 26                 | M                         | 63         | 2012                       | March                       |                 |
| XYMDP001              | 1972      | 17                 | 134                | 1                  | 3                  | 4                  | 15                 | 7                  | F                         | 61         | 2012                       | June                        |                 |

|          |      |    |    |    |    |    |    |     |   |    |      |         |                 |
|----------|------|----|----|----|----|----|----|-----|---|----|------|---------|-----------------|
| XYMDP012 | 1973 | 1  | 5  | 91 | 7  | 4  | 12 | 7   | M | 12 | 2011 | October | IMP-9-producer  |
| XYMDP029 | 1974 | 39 | 5  | 6  | 11 | 4  | 7  | 193 | M | 45 | 2012 | August  | VIM-2-producer  |
| ZSMDP007 | 1975 | 25 | 76 | 36 | 11 | 44 | 4  | 10  | F | 53 | 2011 | October |                 |
| ZZMDP021 | 1976 | 17 | 76 | 11 | 72 | 3  | 10 | 3   | M | 36 | 2012 | June    | IMP-10-producer |

---

<sup>a</sup> M, male; F, female.
